# Supplementary material for: The Scale of Population Structure in Arabidopsis thaliana
Source: PLoS Genet. 2010 Feb 12;6(2):e1000843. doi: 10.1371/journal.pgen.1000843 (PMC2820523; doi:10.1371/journal.pgen.1000843)
Supplement: Text S1 — An analysis of the patterns of FST with respect to predictions of isolation by distance. (0.03 MB DOC) [file pgen.1000843.s006.doc]

One proposed model of population genetics with real geography in two dimensions is one that uses a diffusion approximation of a Wright-Fisher population with migration as a bi-variate Gaussian dispersion process with constant parameters over the organism’s range[1]. At equilibrium, such an organism will exhibit isolation by distance so that the quantity FST/(1-FST) will be a linear function of distance (on a logarithmic scale) between pairs of populations, and that the slope of that function will be inversely proportional to the product of the dispersal parameter and the effective population size[2]. If such an organism had experienced a shift in dispersal parameter or effective population size at some time *t* in the past, the graph of FST/(1-FST) by distance will deviate from linearity and would be dominated by the new parameter for distances less than a critical distance *x*, and dominated by the previous parameters for distances greater than *x*[3][4]. Unfortunately, this model is a poor fit for our observed data. The value of FST/(1-FST), and even moreso its first derivative with respect to distance, is a difficult thing to accurately estimate from a finite sample and will provide only a rough approximation of the parameter in question. Under these circumstances, with a natural organism with irregular geographic distribution, variable population densities, variable (and likely non-Gaussian) dispersion parameters, and complex recent demographic history, useful inference is likely impossible. As shown in figures S5 and S6, using pairwise FST values between all field sites using Fstat v. 2.9.3 (updated from [5]), the values of FST/(1-FST) as a function of distance are poorly described by a linear regression or a simple combination of linear regressions over different spatial scales.

1. Kimura M, Maruyama T (1971) Pattern of neutral polymorphism in a geographically structured population. Genetics Research 18: 125-131.

2. Rousset F (1997) Genetic Differentiation and Estimation of Gene Flow from F-Statistics Under Isolation by Distance. Genetics 145: 1219-1228.

3. Slatkin M (1993) Isolation by Distance in Equilibrium and Non-Equilibrium Populations. Evolution 47: 264-279.

4. Wilkins JF, Marlowe FW (2006) Sex-biased migration in humans: what should we expect from genetic data? BioEssays 28: 290-300. doi:10.1002/bies.20378

5. Goudet J (1995) Fstat version 1.2: a computer program to calculate Fstatistics. Journal of Heredity 86: 485-486.
